# Supplementary material
Source: HighWire-hosted journal article supplement (https://bmjopen.bmj.com/content/9/12/e031289)
Supplement: inline-supplementary-material-5 [file inline-supplementary-material-5.pdf]

Table S4a: Point estimates and confidence intervals of indicators for subsamples of 0-2 and 3-5 month old infants in two districts: Bihar, India, 2015

| Indicator <sup>a</sup> | District <sup>b</sup> | 0-2 month subsample |                                  |       | 3-5 month subsample |                                  |       | Difference     |                     |       |
|------------------------|-----------------------|---------------------|----------------------------------|-------|---------------------|----------------------------------|-------|----------------|---------------------|-------|
|                        |                       | Point estimate      | Confidence interval <sup>c</sup> |       | Point estimate      | Confidence interval <sup>c</sup> |       | Point estimate | Confidence interval |       |
|                        |                       |                     | Lower                            | Upper |                     | Lower                            | Upper |                | Lower               | Upper |
| 1                      | 1                     | 79.2                | 71.9                             | 86.5  | 75.2                | 66.0                             | 84.4  | 4.0            | -7.7                | 15.7  |
| 1                      | 2                     | 80.8                | 74.4                             | 87.2  | 92.3                | 87.5                             | 97.2  | -11.5          | -19.5               | -3.5  |
| 2                      | 1                     | 36.1                | 27.8                             | 44.4  | 41.5                | 31.7                             | 51.3  | -5.4           | -18.2               | 7.4   |
| 2                      | 2                     | 46.5                | 38.1                             | 54.8  | 50.6                | 40.3                             | 61.0  | -4.2           | -17.5               | 9.1   |
| 3                      | 1                     | 81.0                | 75.0                             | 87.1  | 79.5                | 71.5                             | 87.5  | 1.5            | -8.5                | 11.6  |
| 3                      | 2                     | 79.9                | 73.4                             | 86.5  | 74.7                | 65.8                             | 83.7  | 5.2            | -5.9                | 16.3  |
| 4                      | 1                     | 61.8                | 53.1                             | 70.4  | 65.2                | 55.0                             | 75.3  | -3.4           | -16.7               | 10.0  |
| 4                      | 2                     | 62.7                | 54.7                             | 70.7  | 58.4                | 48.4                             | 68.3  | 4.4            | -8.4                | 17.1  |
| 5                      | 1                     | 45.0                | 36.2                             | 53.9  | 46.8                | 35.5                             | 58.0  | -1.7           | -16.0               | 12.6  |
| 5                      | 2                     | 49.1                | 40.8                             | 57.4  | 43.5                | 33.3                             | 53.7  | 5.6            | -7.6                | 18.7  |
| 6                      | 1                     | 60.3                | 51.9                             | 68.7  | 59.8                | 49.6                             | 70.0  | 0.5            | -12.7               | 13.7  |
| 6                      | 2                     | 68.5                | 60.8                             | 76.1  | 55.8                | 45.7                             | 65.8  | 12.7           | 0.0                 | 25.4  |
| 7                      | 1                     | 40.3                | 31.8                             | 48.8  | 38.4                | 27.4                             | 49.3  | 1.9            | -11.9               | 15.8  |
| 7                      | 2                     | 74.5                | 67.2                             | 81.9  | 69.8                | 60.3                             | 79.3  | 4.7            | -7.3                | 16.8  |
| 8                      | 1                     | 49.3                | 41.2                             | 57.3  | 38.2                | 27.9                             | 48.5  | 11.1           | -2.0                | 24.2  |
| 8                      | 2                     | 60.0                | 52.0                             | 67.9  | 46.4                | 36.7                             | 56.2  | 13.6           | 1.0                 | 26.1  |
| 9                      | 1                     | 39.8                | 31.3                             | 48.4  | 44.4                | 33.9                             | 54.8  | -4.5           | -18.0               | 9.0   |
| 9                      | 2                     | 44.7                | 36.6                             | 52.8  | 41.7                | 31.5                             | 51.9  | 3.0            | -10.0               | 16.0  |
| 10                     | 1                     | 61.9                | 54.4                             | 69.4  | 56.1                | 45.3                             | 66.9  | 5.7            | -7.4                | 18.9  |
| 10                     | 2                     | 63.9                | 56.1                             | 71.7  | 50.5                | 40.3                             | 60.6  | 13.5           | 0.7                 | 26.2  |
| 11                     | 1                     | 98.4                | 96.3                             | 100.6 | 97.6                | 94.3                             | 100.9 | 0.8            | -3.1                | 4.8   |
| 11                     | 2                     | 96.7                | 94.1                             | 99.3  | 97.7                | 95.1                             | 100.3 | -1.0           | -4.7                | 2.7   |
| 12                     | 1                     | 65.0                | 56.4                             | 73.6  | 71.3                | 61.8                             | 80.7  | -6.3           | -19.1               | 6.5   |
| 12                     | 2                     | 77.8                | 71.1                             | 84.6  | 84.1                | 76.7                             | 91.4  | -6.2           | -16.2               | 3.8   |
| 13                     | 1                     | 3.3                 | 0.1                              | 6.5   | 1.6                 | -1.5                             | 4.8   | 1.7            | -2.8                | 6.2   |
| 13                     | 2                     | 6.7                 | 2.6                              | 10.9  | 2.8                 | 0.0                              | 5.6   | 3.9            | -1.1                | 8.9   |
| 14                     | 1                     | 2.2                 | -0.4                             | 4.8   | 1.6                 | -1.5                             | 4.8   | 0.6            | -3.5                | 4.7   |
| 14                     | 2                     | 4.5                 | 1.0                              | 8.0   | 2.3                 | -0.4                             | 4.9   | 2.2            | -2.2                | 6.6   |
| 15                     | 1                     | 35.2                | 26.8                             | 43.6  | 30.4                | 20.9                             | 39.9  | 4.8            | -7.8                | 17.5  |
| 15                     | 2                     | 56.8                | 48.7                             | 64.9  | 54.8                | 44.3                             | 65.3  | 2.0            | -11.3               | 15.2  |
| 16                     | 1                     | 5.3                 | 1.4                              | 9.3   | 0.9                 | -0.8                             | 2.6   | 4.5            | 0.2                 | 8.7   |
| 16                     | 2                     | 16.6                | 10.2                             | 23.0  | 11.0                | 4.8                              | 17.1  | 5.7            | -3.2                | 14.5  |
| 17                     | 1                     | 59.6                | 51.4                             | 67.9  | 49.5                | 38.7                             | 60.3  | 10.1           | -3.5                | 23.7  |
| 17                     | 2                     | 64.4                | 56.5                             | 72.4  | 59.9                | 49.8                             | 70.0  | 4.5            | -8.3                | 17.4  |
| 18                     | 1                     | 24.2                | 16.8                             | 31.6  | 22.2                | 13.9                             | 30.5  | 2.0            | -9.1                | 13.1  |
| 18                     | 2                     | 45.9                | 38.1                             | 53.8  | 40.3                | 32.0                             | 48.6  | 5.7            | -5.7                | 17.1  |
| 19                     | 1                     | 17.9                | 11.2                             | 24.5  | 9.2                 | 2.4                              | 16.1  | 8.6            | -0.9                | 18.2  |
| 19                     | 2                     | 40.5                | 32.4                             | 48.6  | 37.7                | 29.0                             | 46.4  | 2.8            | -9.0                | 14.6  |
| 20                     | 1                     | 42.5                | 34.8                             | 50.2  | 35.1                | 26.0                             | 44.2  | 7.4            | -4.5                | 19.4  |
| 20                     | 2                     | 59.4                | 51.7                             | 67.0  | 50.7                | 42.3                             | 59.1  | 8.6            | -2.7                | 20.0  |
| 21                     | 1                     | 37.0                | 29.2                             | 44.8  | 22.1                | 13.1                             | 31.2  | 14.9           | 2.9                 | 26.8  |
| 21                     | 2                     | 54.2                | 46.1                             | 62.3  | 47.7                | 38.9                             | 56.6  | 6.5            | -5.6                | 18.5  |
| 22                     | 1                     | 62.5                | 54.0                             | 70.9  | 54.7                | 44.8                             | 64.6  | 7.8            | -5.2                | 20.8  |
| 22                     | 2                     | 69.7                | 62.3                             | 77.1  | 65.5                | 55.4                             | 75.5  | 4.2            | -8.2                | 16.7  |
| 23                     | 1                     | 47.5                | 39.1                             | 55.9  | 46.1                | 35.0                             | 57.3  | 1.4            | -12.5               | 15.3  |

|      |   |      |      |      |      |       |      |       |       |      |
|------|---|------|------|------|------|-------|------|-------|-------|------|
| 23   | 2 | 64.9 | 56.9 | 73.0 | 58.9 | 48.4  | 69.5 | 6.0   | -7.3  | 19.3 |
| 24   | 1 | 75.1 | 67.4 | 82.9 | 75.3 | 66.0  | 84.7 | -0.2  | -12.4 | 11.9 |
| 24   | 2 | 67.6 | 59.7 | 75.5 | 81.0 | 72.7  | 89.3 | -13.4 | -24.8 | -1.9 |
| 25   | 1 | 12.1 | 6.1  | 18.0 | 13.1 | 5.9   | 20.2 | -1.0  | -10.3 | 8.3  |
| 25   | 2 | 16.7 | 10.3 | 23.1 | 22.7 | 13.8  | 31.6 | -6.0  | -16.9 | 4.9  |
| 26   | 1 | 76.2 | 68.6 | 83.8 | 77.5 | 68.5  | 86.6 | -1.3  | -13.1 | 10.5 |
| 26   | 2 | 69.4 | 61.6 | 77.2 | 81.6 | 73.3  | 89.8 | -12.2 | -23.6 | -0.8 |
| 27   | 1 | 50.4 | 41.5 | 59.3 | 43.4 | 33.0  | 53.9 | 6.9   | -6.8  | 20.7 |
| 27   | 2 | 57.2 | 48.9 | 65.4 | 66.9 | 57.7  | 76.0 | -9.7  | -22.0 | 2.7  |
| 28   | 1 | 8.6  | 3.7  | 13.6 | 6.0  | 1.3   | 10.6 | 2.7   | -4.1  | 9.5  |
| 28   | 2 | 9.8  | 5.1  | 14.5 | 19.7 | 11.4  | 28.1 | -9.9  | -19.5 | -0.3 |
| 29   | 1 | 50.4 | 41.5 | 59.3 | 45.6 | 35.4  | 55.9 | 4.8   | -8.8  | 18.4 |
| 29   | 2 | 59.2 | 51.1 | 67.4 | 69.7 | 60.5  | 79.0 | -10.5 | -22.9 | 1.8  |
| 30   | 1 | 32.7 | 24.5 | 41.0 | 36.3 | 25.9  | 46.7 | -3.6  | -16.9 | 9.7  |
| 30   | 2 | 49.2 | 41.0 | 57.4 | 54.7 | 44.3  | 65.1 | -5.5  | -18.8 | 7.7  |
| 31   | 1 | 42.0 | 33.0 | 51.1 | 49.2 | 39.0  | 59.5 | -7.2  | -20.9 | 6.5  |
| 31   | 2 | 48.6 | 40.3 | 56.8 | 58.9 | 48.8  | 69.0 | -10.3 | -23.3 | 2.7  |
| 32   | 1 | 3.9  | 0.4  | 7.3  | 3.2  | -0.4  | 6.8  | 0.7   | -4.3  | 5.7  |
| 32   | 2 | 9.4  | 4.2  | 14.5 | 10.7 | 4.7   | 16.8 | -1.4  | -9.3  | 6.5  |
| 33   | 1 | 43.6 | 34.5 | 52.6 | 51.4 | 41.1  | 61.7 | -7.8  | -21.6 | 5.9  |
| 33   | 2 | 52.9 | 44.8 | 61.0 | 61.1 | 51.1  | 71.2 | -8.2  | -21.1 | 4.7  |
| 34   | 1 | 7.0  | 2.5  | 11.5 | 14.2 | 7.0   | 21.4 | -7.2  | -15.7 | 1.2  |
| 34   | 2 | 8.6  | 3.8  | 13.4 | 9.5  | 4.0   | 15.0 | -0.9  | -8.2  | 6.4  |
| 35   | 1 | 57.2 | 48.2 | 66.2 | 62.5 | 52.7  | 72.4 | -5.3  | -18.7 | 8.0  |
| 35   | 2 | 63.2 | 55.1 | 71.4 | 77.6 | 68.6  | 86.6 | -14.3 | -26.5 | -2.2 |
| 37   | 1 | 76.6 | 69.1 | 84.1 | 72.3 | 62.7  | 81.8 | 4.3   | -7.8  | 16.4 |
| 37   | 2 | 81.6 | 74.9 | 88.3 | 91.3 | 85.8  | 96.8 | -9.7  | -18.4 | -1.0 |
| 38   | 1 | 59.0 | 49.9 | 68.0 | 49.7 | 39.3  | 60.2 | 9.2   | -4.6  | 23.1 |
| 38   | 2 | 56.1 | 47.8 | 64.4 | 69.7 | 61.2  | 78.2 | -13.6 | -25.5 | -1.7 |
| 39   | 1 | 0.0  | 0.0  | 0.0  | 0.0  | 0.0   | 0.0  | 0.0   | 0.0   | 0.0  |
| 39   | 2 | 5.8  | -3.1 | 14.7 | 9.6  | -40.1 | 59.3 | -3.8  | -54.3 | 46.7 |
| 39.5 | 1 | 0.0  | 0.0  | 0.0  | 0.0  | 0.0   | 0.0  | 0.0   | 0.0   | 0.0  |
| 39.5 | 2 | 1.1  | -0.4 | 2.6  | 0.7  | -0.7  | 2.1  | 0.3   | -1.7  | 2.4  |
| 40   | 1 | 17.6 | 10.9 | 24.4 | 13.6 | 7.5   | 19.8 | 4.0   | -5.2  | 13.2 |
| 40   | 2 | 8.0  | 3.9  | 12.1 | 11.6 | 5.6   | 17.7 | -3.7  | -11.0 | 3.6  |
| 42   | 1 | 52.6 | 44.3 | 61.0 | 40.1 | 29.6  | 50.6 | 12.5  | -0.9  | 25.9 |
| 42   | 2 | 47.5 | 39.4 | 55.6 | 44.6 | 34.4  | 54.8 | 2.9   | -10.2 | 16.0 |
| 43   | 1 | 35.6 | 27.4 | 43.8 | 22.6 | 13.6  | 31.5 | 13.1  | 0.9   | 25.2 |
| 43   | 2 | 35.5 | 28.0 | 43.0 | 24.8 | 16.4  | 33.1 | 10.8  | -0.5  | 22.0 |
| 44   | 1 | 10.1 | 4.2  | 16.0 | 17.6 | 9.5   | 25.7 | -7.5  | -17.6 | 2.5  |
| 44   | 2 | 20.6 | 14.1 | 27.0 | 16.2 | 8.7   | 23.8 | 4.3   | -5.6  | 14.3 |
| 45   | 1 | 9.0  | -4.7 | 22.7 | 13.7 | -0.7  | 28.1 | -4.7  | -24.6 | 15.2 |
| 45   | 2 | 6.6  | -9.9 | 23.2 | 14.4 | 14.4  | 14.4 | -7.7  | -24.3 | 8.8  |
| 46   | 1 | 63.4 | 54.6 | 72.2 | 52.8 | 41.5  | 64.0 | 10.7  | -3.6  | 24.9 |
| 46   | 2 | 68.9 | 61.1 | 76.7 | 62.5 | 52.6  | 72.4 | 6.4   | -6.2  | 19.0 |
| 47   | 1 | 33.0 | 24.7 | 41.4 | 32.5 | 22.2  | 42.9 | 0.5   | -12.8 | 13.8 |
| 47   | 2 | 70.4 | 62.8 | 77.9 | 65.3 | 55.9  | 74.8 | 5.1   | -7.1  | 17.2 |
| 48   | 1 | 68.8 | 60.6 | 77.0 | 63.2 | 52.5  | 73.8 | 5.7   | -7.8  | 19.1 |
| 48   | 2 | 76.2 | 69.3 | 83.0 | 81.3 | 73.9  | 88.6 | -5.1  | -15.2 | 5.0  |
| 49   | 1 | 66.5 | 57.9 | 75.1 | 52.7 | 41.0  | 64.3 | 13.8  | -0.6  | 28.3 |
| 49   | 2 | 68.6 | 59.9 | 77.3 | 64.4 | 53.8  | 75.0 | 4.2   | -9.5  | 17.9 |
| 50   | 1 | 51.7 | 42.1 | 61.4 | 59.5 | 47.6  | 71.5 | -7.8  | -23.1 | 7.6  |

|    |   |      |      |      |      |      |      |       |       |      |
|----|---|------|------|------|------|------|------|-------|-------|------|
| 50 | 2 | 55.2 | 46.3 | 64.1 | 55.8 | 45.1 | 66.6 | -0.7  | -14.6 | 13.3 |
| 51 | 1 | 33.2 | 14.6 | 51.7 | 61.0 | 36.7 | 85.4 | -27.9 | -58.5 | 2.7  |
| 51 | 2 | 40.6 | 17.5 | 63.7 | 43.0 | -6.7 | 92.7 | -2.4  | -57.2 | 52.4 |
| 52 | 1 | 73.0 | 65.1 | 80.9 | 39.7 | 28.6 | 50.7 | 33.3  | 19.8  | 46.9 |
| 52 | 2 | 83.8 | 78.2 | 89.3 | 45.8 | 35.6 | 55.9 | 38.0  | 26.4  | 49.5 |

a. For text see Table S1

b. 1 Aurangabad, 2 Gopalganj

c. Estimated with Stata command svy
